# Supplementary material
Source: PubMed Central journal article supplement (PMC8250068)
Supplement: FSB2-35-e21360-s002.pdf [file FSB2-35-e21360-s002.pdf]

| Pathway    | Genes                                                                                                                                                                                     |
|------------|-------------------------------------------------------------------------------------------------------------------------------------------------------------------------------------------|
| <b>P1</b>  | BCL2L1, PTGS2, CDKN1A, NFKBIA, EGFR, BAX, BID, JUN, MAPK3, MAPK1, NFKB1, MYC, BIRC5, CHUK, PPARG, VEGFA, MAPK8, IL2RA, TP53, CASP3, CCND1, CASP8, CASP9, IL6, CDK4, MMP9, MMP2, IL8, BCL2 |
| <b>P2</b>  | CCL2, PTGS2, CDKN1A, NFKBIA, EGFR, BAX, IL1B, BID, IFNB1, MAPK3, MAPK1, NFKB1, MYC, CHUK, TNF, VEGFA, TP53, CASP3, CCND1, CASP8, CASP9, IL6, CDK4, IL8                                    |
| <b>P3</b>  | BIRC5, NFKBIA, BAX, BID, JUN, IFNB1, MAPK3, MAPK1, NFKB1, MYC, CDKN1A, CHUK, TNF, MAPK8, TP53, CASP3, CASP8, CASP9, IL6, MMP9, IL8, BCL2                                                  |
| <b>P4</b>  | PTGS2, CDKN1A, NFKBIA, BAX, BID, JUN, IFNB1, MAPK3, MAPK1, NFKB1, MYC, CHUK, VEGFA, MAPK8, TP53, CASP3, CCND1, CASP8, CASP9, IL6, CDK4, IL8                                               |
| <b>P5</b>  | BCL2L1, TP53, CASP3, BID, NFKBIA, JUN, CHUK, CASP8, CASP9, MAPK3, PARP1, MAPK1, MCL1, BAX, NFKB1, MAPK8, BIRC5, TNF, BCL2                                                                 |
| <b>P6</b>  | BCL2L1, IL2RA, TP53, CASP3, CCND1, BID, NFKBIA, JUN, CHUK, CASP8, IFNB1, IL6, CDK4, BAX, NFKB1, IL1B, CASP9, MAPK8, BCL2                                                                  |
| <b>P7</b>  | CCL2, TNF, CASP3, CDK4, JUN, BAX, CCND1, IL6, MAPK3, MAPK1, VEGFA, NFKB1, IL1B, MMP2, MAPK8, IL8, BCL2                                                                                    |
| <b>P8</b>  | TP53, CASP3, CCND1, CDKN1A, NFKBIA, JUN, CHUK, CASP8, BID, IL6, TNF, CDK4, BAX, CASP9, NFKB1, MYC, IFNB1, MAPK8, BCL2                                                                     |
| <b>P9</b>  | TP53, CASP3, CCND1, CDKN1A, NFKBIA, EGFR, CHUK, CASP8, IFNB1, MAPK3, MAPK1, CDK4, BAX, NFKB1, MYC, CASP9, BID, TNF                                                                        |
| <b>P10</b> | CCL2, CASP3, NLRP3, CDK4, BID, NFKBIA, CHUK, CASP8, IFNB1, IL6, MAPK3, MAPK1, TNF, BAX, NFKB1, IL1B, CASP9, IL8                                                                           |
| <b>P11</b> | BCL2L1, CCL2, NLRP3, NFKBIA, JUN, CHUK, CASP8, IFNB1, IL6, MAPK3, MAPK1, TNF, P2RX7, NFKB1, IL1B, MAPK8, IL8, BCL2                                                                        |
| <b>P12</b> | CCL2, PTGS2, CASP3, NFKBIA, JUN, CHUK, CASP8, IL6, MAPK3, MAPK1, TNF, MMP9, NFKB1, IL1B, MAPK8, IL8                                                                                       |
| <b>P13</b> | CCL2, PTGS2, CASP3, NFKBIA, JUN, CHUK, CASP8, IFNB1, IL6, MAPK3, MAPK1, MMP9, NFKB1, IL1B, MAPK8, TNF                                                                                     |
| <b>P14</b> | BCL2L1, IL2RA, TP53, CCND1, CDKN1A, NFKBIA, JUN, CHUK, BAX, IL6, MAPK3, MAPK1, CDK4, NFKB1, MYC, MAPK8, TNF                                                                               |
| <b>P15</b> | BCL2L1, TP53, CDK4, CDKN1A, EGFR, CHUK, BAX, CASP9, CCND1, MAPK3, MAPK1, VEGFA, NFKB1, MAPK8                                                                                              |

Fig. S1 The list of genes in top 15 pathways

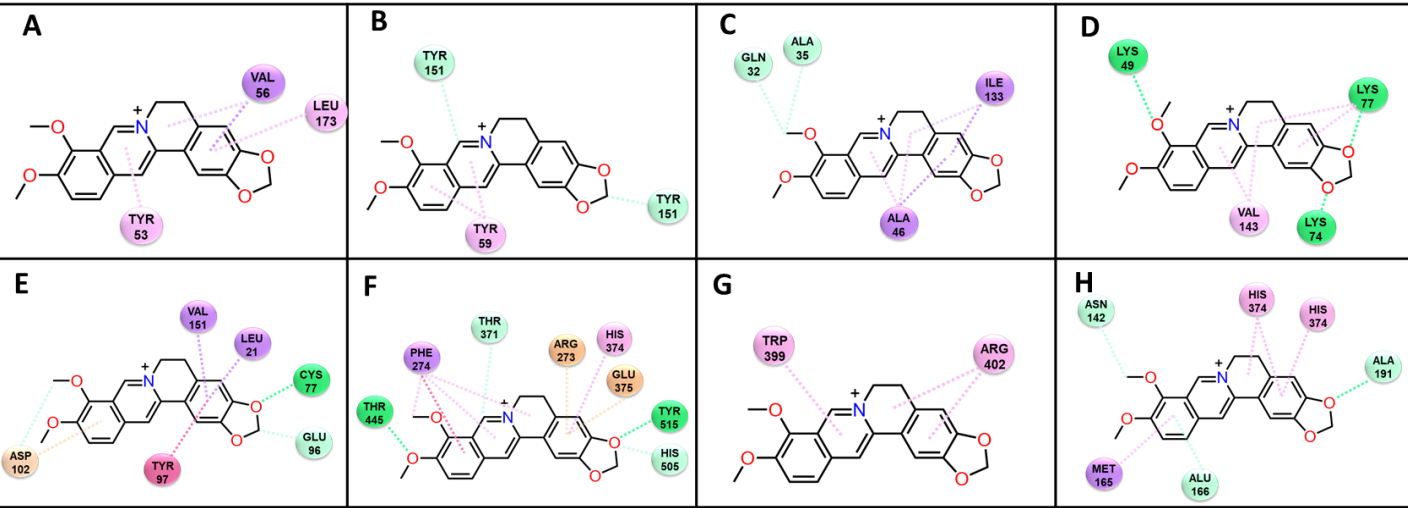

Fig. S2 Binding interactions in complex MAPK3-berberine, TNF-Berberine, BAX-berberine, BAX-berberine, NFκB1-berberine, CHUK-berberine, ACE2-berberine, TMPRSS2 -berberine, 3CLpro-berberine. Predicted lowest-energy binding mode of berberine with the following proteins in 2-dimensional images: (A) MAPK3; (B) TNF; (C) BAX ; (D) NFκB1; (E) CHUK; (F) ACE2 ; (G)TMPRSS2; (F) 3CLpro. The green, purple, and orange lines stand for hydrogen binding, hydrophobic interaction, and anion-π interaction between berberine and residues, respectively.

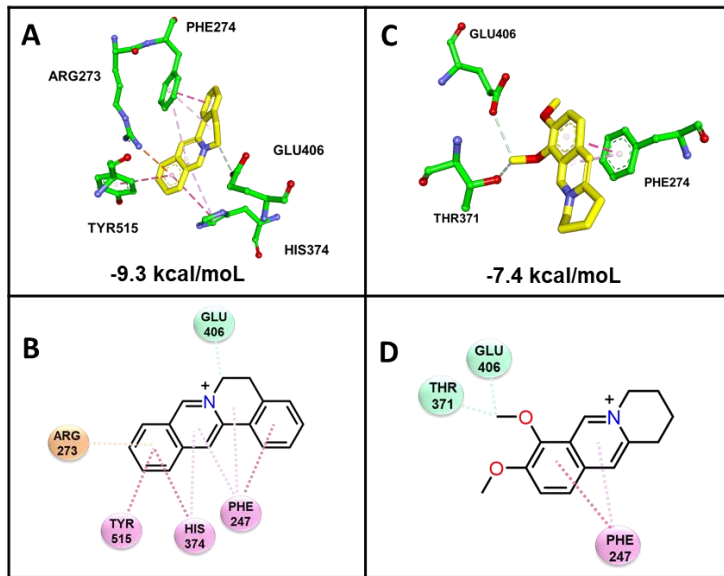

Fig. S3 Binding explorations of complex ACE2-analog1 and ACE2-analog1 . Predicted lowest-energy binding mode of ACE2-analog1 in 3-dimensional image (A) and 2-dimensional image (B); ACE2-analog2 in 3-dimensional image (C) and 2-dimensional image (D). For analogs, the C, O and N are highlighted in yellow, red and blue, respectively. For residues of proteins, the green, red and blue stand for C, O and N, respectively. The green, purple, orange lines stand for hydrogen binding, hydrophobic interaction and anion- $\pi$  interaction between BBR and related residents, respectively.

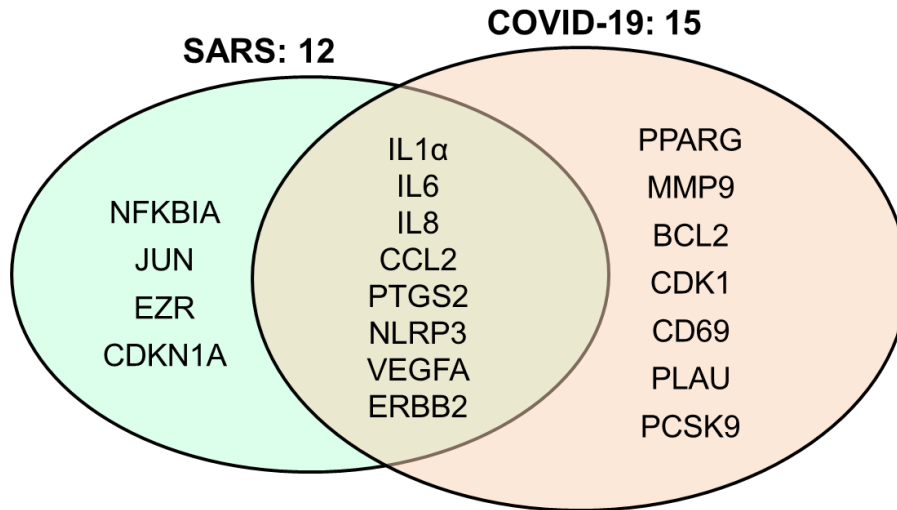

Fig. S4 Comparison of regulated targets of berberine on the lung for SARS and COVID-19. There are 12 and 15 pharmacological targets for SARS and COVID-19 respectively. Among them, 8 shared targets were displayed in overlap area.
